# Supplementary material
Source: PubMed Central journal article supplement (PMC5985956)
Supplement: NIHMS75015-supplement-Supplemental_Tables.pdf [file NIHMS75015-supplement-Supplemental_Tables.pdf]

**Table S1a.** SNPs included in the genetic risk scores

| <b>Risk score</b> | <b>SNP name</b> | <b>Proxy</b>           | <b>Chr.</b> | <b>Position</b> | <b>Coded allele</b> |
|-------------------|-----------------|------------------------|-------------|-----------------|---------------------|
| <b>Adult BMI</b>  |                 |                        |             |                 |                     |
| <i>RARB</i>       | rs6804842       |                        | 3           | 25106437        | G                   |
| <i>TFAP2B</i>     | rs2207139       |                        | 6           | 50845490        | G                   |
| <i>MAP2K5</i>     | rs16951275      |                        | 15          | 68077168        | T                   |
| <i>FLJ45139</i>   | rs2836754       |                        | 21          | 40291740        | C                   |
| <i>FTO</i>        | rs1558902       |                        | 16          | 53803574        | A                   |
| <i>NLRC3</i>      | rs758747        |                        | 16          | 3627358         | T                   |
| <i>CADM1</i>      | rs12286929      |                        | 11          | 115022404       | G                   |
| <i>IFNGR1</i>     | rs13201877      |                        | 6           | 137675541       | G                   |
| <i>RALYL</i>      | rs2033732       |                        | 8           | 85079709        | C                   |
| <i>GRID1</i>      | rs7899106       |                        | 10          | 87410904        | G                   |
| <i>CBLN1</i>      | rs2080454       |                        | 16          | 49062590        | C                   |
| <i>TAL1</i>       | rs977747        |                        | 1           | 47684677        | T                   |
| <i>NT5C2</i>      | rs11191560      |                        | 10          | 104869038       | C                   |
| <i>EPB41L4B</i>   | rs6477694       |                        | 9           | 111932342       | C                   |
| <i>ZBTB10</i>     | rs16907751      |                        | 8           | 81375457        | C                   |
| <i>DOC2A</i>      | rs4787491       |                        | 16          | 30015337        | G                   |
| <i>AGBL4</i>      | rs657452        |                        | 1           | 49589847        | A                   |
| <i>HSD17B12</i>   | rs2176598       |                        | 11          | 43864278        | T                   |
| <i>TLR4</i>       | rs1928295       |                        | 9           | 120378483       | T                   |
| <i>RBM26</i>      | rs1441264       |                        | 13          | 79580919        | A                   |
| <i>FUBP1</i>      | rs12401738      |                        | 1           | 78446761        | A                   |
| <i>PRKD1</i>      | rs12885454      |                        | 14          | 29736838        | C                   |
| <i>BDNF</i>       | rs11030104      |                        | 11          | 27684517        | A                   |
| <i>NAVI</i>       | rs2820292       |                        | 1           | 201784287       | C                   |
| <i>MTCH2</i>      | rs3817334       |                        | 11          | 47650993        | T                   |
| <i>C5orf37</i>    | rs2112347       |                        | 5           | 75015242        | T                   |
| <i>EHBP1</i>      | rs11688816      |                        | 2           | 63053048        | G                   |
| <i>RASA2</i>      | rs16851483      |                        | 3           | 141275436       | T                   |
| <i>ZFP64</i>      | rs6091540       |                        | 20          | 51087862        | C                   |
| <i>HHIP</i>       | rs11727676      |                        | 4           | 145659064       | T                   |
| <i>PACRG</i>      | rs13191362      |                        | 6           | 163033350       | A                   |
| <i>FHIT</i>       | rs2365389       | rs6445197 <sup>a</sup> | 3           | 61213993        | C                   |
| <i>MC4R</i>       | rs6567160       |                        | 18          | 57829135        | C                   |
| <i>KCTD15</i>     | rs29941         |                        | 19          | 34309532        | G                   |
| <i>ADCY3</i>      | rs10182181      |                        | 2           | 25150296        | G                   |
| <i>QPCTL</i>      | rs2287019       |                        | 19          | 46202172        | C                   |
| <i>LMX1B</i>      | rs10733682      |                        | 9           | 129460914       | A                   |
| <i>SBK1</i>       | rs2650492       |                        | 16          | 28333411        | A                   |
| <i>TCF7L2</i>     | rs7903146       |                        | 10          | 114758349       | C                   |
| <i>RPL27A</i>     | rs4256980       |                        | 11          | 8673939         | G                   |
| <i>C6orf106</i>   | rs205262        |                        | 6           | 34563164        | G                   |
| <i>LRP1B</i>      | rs2121279       |                        | 2           | 143043285       | T                   |
| <i>SLC39A8</i>    | rs13107325      |                        | 4           | 103188709       | T                   |
| <i>GNPDA2</i>     | rs10938397      |                        | 4           | 45182527        | G                   |
| <i>NPCI</i>       | rs1808579       |                        | 18          | 21104888        | C                   |

|                 |            |                        |    |           |   |
|-----------------|------------|------------------------|----|-----------|---|
| <i>UBE2E3</i>   | rs1528435  |                        | 2  | 181550962 | T |
| <i>C19orf7</i>  | rs3810291  |                        | 19 | 47569003  | A |
| <i>BCDIN3D</i>  | rs7138803  |                        | 12 | 50247468  | A |
| <i>CADM2</i>    | rs13078960 |                        | 3  | 85807590  | G |
| <i>USP37</i>    | rs492400   |                        | 2  | 219349752 | C |
| <i>TOMM40</i>   | rs2075650  |                        | 19 | 45395619  | A |
| <i>TNNI3K</i>   | rs12566985 |                        | 1  | 75002193  | G |
| <i>ASB4</i>     | rs6465468  |                        | 7  | 95169514  | T |
| <i>CLIP1</i>    | rs11057405 |                        | 12 | 122781897 | G |
| <i>MTIF3</i>    | rs12016871 |                        | NA | NA        | T |
| <i>STXBP6</i>   | rs10132280 |                        | 14 | 25928179  | C |
| <i>PRKD1</i>    | rs11847697 |                        | 14 | 30515112  | T |
| <i>HIF1AN</i>   | rs17094222 |                        | 10 | 102395440 | C |
| <i>LINGO2</i>   | rs10968576 |                        | 9  | 28414339  | G |
| <i>FANCL</i>    | rs1016287  |                        | 2  | 59305625  | T |
| <i>CREB1</i>    | rs17203016 |                        | 2  | 208255518 | G |
| <i>KCNK3</i>    | rs11126666 |                        | 2  | 26928811  | A |
| <i>LRFN2</i>    | rs2033529  |                        | 6  | 40348653  | G |
| <i>ELAVL4</i>   | rs11583200 |                        | 1  | 50559820  | C |
| <i>SMG6</i>     | rs9914578  |                        | 17 | 2005136   | G |
| <i>HIP1</i>     | rs1167827  |                        | 7  | 75163169  | G |
| <i>ETV5</i>     | rs1516725  |                        | 3  | 185824004 | C |
| <i>ADPGK</i>    | rs7164727  |                        | 15 | 73093991  | T |
| <i>GBE1</i>     | rs3849570  |                        | 3  | 81792112  | A |
| <i>MAN1A1</i>   | rs9374842  |                        | 6  | 120185665 | T |
| <i>RIT2</i>     | rs7239883  |                        | 18 | 40147671  | G |
| <i>FIGN</i>     | rs1460676  |                        | 2  | 164567689 | C |
| <i>KIAA1303</i> | rs12940622 |                        | 17 | 78615571  | G |
| <i>ERBB4</i>    | rs7599312  |                        | 2  | 213413231 | G |
| <i>DMXL2</i>    | rs3736485  |                        | 15 | 51748610  | A |
| <i>PCDH9</i>    | rs9540493  |                        | 13 | 66205704  | A |
| <i>RABEP1</i>   | rs1000940  |                        | 17 | 5283252   | G |
| <i>NRXN3</i>    | rs7141420  |                        | 14 | 79899454  | T |
| <i>GALNT10</i>  | rs7715256  |                        | 5  | 153537893 | G |
| <i>GPRC5B</i>   | rs12446632 |                        | 16 | 19935389  | G |
| <i>GRP</i>      | rs7243357  |                        | 18 | 56883319  | T |
| <i>GNAT2</i>    | rs17024393 |                        | 1  | 110154688 | C |
| <i>SCARB2</i>   | rs17001654 |                        | 4  | 77129568  | G |
| <i>MYST1</i>    | rs9925964  | rs1978487 <sup>a</sup> | 16 | 31129942  | C |
| <i>OLFM4</i>    | rs12429545 |                        | 13 | 54102206  | A |
| <i>C9orf93</i>  | rs4740619  |                        | 9  | 15634326  | T |
| <i>CALCR</i>    | rs9641123  |                        | 7  | 93197732  | C |
| <i>NEGR1</i>    | rs3101336  |                        | 1  | 72751185  | C |
| <i>ATP2A1</i>   | rs3888190  |                        | 16 | 28889486  | A |
| <i>HNF4G</i>    | rs17405819 |                        | 8  | 76806584  | T |
| <i>KIAA1505</i> | rs2245368  |                        | 7  | 76608143  | C |
| <i>PGPEP1</i>   | rs17724992 | rs9636202 <sup>a</sup> | 19 | 18449238  | A |
| <i>FOXO3</i>    | rs9400239  |                        | 6  | 108977663 | C |
| <i>SEC16B</i>   | rs543874   |                        | 1  | 177889480 | G |
| <i>IRS1</i>     | rs2176040  |                        | 2  | 227092802 | A |

|                  |            |                         |    |           |   |
|------------------|------------|-------------------------|----|-----------|---|
| <i>PTBP2</i>     | rs11165643 |                         | 1  | 96924097  | T |
| <i>TMEM18</i>    | rs13021737 | rs13012571 <sup>a</sup> | 2  | 632550    | G |
| <b>Adult WHR</b> |            |                         |    |           |   |
| <i>BCL2</i>      | rs12454712 |                         | 18 | 58996864  | T |
| <i>BMP2</i>      | rs979012   |                         | 20 | 6571374   | T |
| <i>ADAMTS9</i>   | rs2371767  | rs4607103 <sup>b</sup>  | 3  | 64686944  | T |
| <i>SFXN2</i>     | rs7917772  |                         | 10 | 104477433 | A |
| <i>SPATA5</i>    | rs303084   |                         | 4  | 124286398 | A |
| <i>WARS2</i>     | rs2645294  |                         | 1  | 119376110 | T |
| <i>SMAD6</i>     | rs1440372  |                         | 15 | 64820205  | C |
| <i>MEIS1</i>     | rs1385167  |                         | 2  | 66054152  | G |
| <i>VEGFA</i>     | rs1358980  |                         | 6  | 43872529  | T |
| <i>EYA2</i>      | rs6090583  |                         | 20 | 44992238  | A |
| <i>DCST2</i>     | rs905938   |                         | 1  | 153258013 | T |
| <i>CCDC92</i>    | rs4765219  |                         | 12 | 123006063 | C |
| <i>CMIP</i>      | rs2925979  |                         | 16 | 80092291  | T |
| <i>ITPR2</i>     | rs10842707 |                         | 12 | 26362631  | T |
| <i>DNM3</i>      | rs714515   |                         | 1  | 170619613 | G |
| <i>PEMT</i>      | rs4646404  |                         | 17 | 17360924  | G |
| <i>SNX10</i>     | rs1534696  |                         | 7  | 26363764  | C |
| <i>JUND</i>      | rs12608504 |                         | 19 | 18250135  | A |
| <i>MSC</i>       | rs12679556 |                         | 8  | 72676782  | G |
| <i>CALCRL</i>    | rs1569135  |                         | 2  | 187823643 | A |
| <i>LY86</i>      | rs1294410  |                         | 6  | 6683751   | C |
| <i>HMGA1</i>     | rs1776897  |                         | 6  | 34302989  | G |
| <i>RFXDC2</i>    | rs8030605  |                         | 15 | 54291890  | A |
| <i>HOXC13</i>    | rs1443512  |                         | 12 | 52628951  | A |
| <i>TNFAIP8</i>   | rs1045241  |                         | 5  | 118757185 | C |
| <i>BTNL2</i>     | rs7759742  |                         | 6  | 32489714  | A |
| <i>SCYL1BP1</i>  | rs10919388 |                         | 1  | 168639127 | C |
| <i>ABCA1</i>     | rs10991437 |                         | 9  | 106775741 | A |
| <i>HOXA11</i>    | rs7801581  |                         | 7  | 27190296  | T |
| <i>RSPO3</i>     | rs1936805  |                         | 6  | 127493809 | T |
| <i>CPEB4</i>     | rs7705502  |                         | 5  | 173253421 | A |
| <i>PPARG</i>     | rs17819328 |                         | 3  | 12464342  | G |
| <i>FAM13A1</i>   | rs9991328  |                         | 4  | 89932144  | T |
| <i>PBRM1</i>     | rs2276824  |                         | 3  | 52612526  | C |
| <i>SLC30A10</i>  | rs2820443  |                         | 1  | 217820132 | T |
| <i>FLRT1</i>     | rs11231693 |                         | 11 | 63619188  | A |
| <i>COBLL1</i>    | rs10195252 |                         | 2  | 165221337 | T |
| <i>NMU</i>       | rs3805389  |                         | 4  | 56177507  | A |
| <i>KCNJ2</i>     | rs8066985  |                         | 17 | 65964940  | A |
| <i>NKX3-1</i>    | rs7830933  |                         | 8  | 23659269  | A |
| <i>CEBPA</i>     | rs4081724  |                         | 19 | 38516786  | G |
| <i>NFE2L3</i>    | rs10245353 |                         | 7  | 25825139  | A |
| <i>MAP3K1</i>    | rs9687846  |                         | 5  | 55897651  | A |
| <i>ZNRF3</i>     | rs2294239  |                         | 22 | 27779477  | A |
| <i>GDF5</i>      | rs224333   |                         | 20 | 33487376  | G |
| <i>PLXND1</i>    | rs10804591 |                         | 3  | 130816923 | A |
| <i>FLJ16641</i>  | rs17451107 |                         | 3  | 158280303 | T |

**Child BMI**

|               |            |                        |    |           |   |
|---------------|------------|------------------------|----|-----------|---|
| <i>GNPDA2</i> | rs13130484 |                        | 4  | 44870448  | T |
| <i>ADCY3</i>  | rs11676272 |                        | 2  | 24995042  | G |
| <i>TMEM18</i> | rs4854349  |                        | 2  | 637861    | C |
| <i>SEC16B</i> | rs543874   |                        | 1  | 176156103 | G |
| <i>FAIM2</i>  | rs7132908  |                        | 12 | 48549415  | A |
| <i>FTO</i>    | rs1421085  | rs3751812 <sup>b</sup> | 16 | 52358455  | G |
| <i>OLFM4</i>  | rs12429545 |                        | 13 | 53000207  | A |
| <i>TFAP2B</i> | rs987237   |                        | 6  | 50911009  | G |
| <i>TNNI3K</i> | rs12041852 |                        | 1  | 74776088  | G |
| <i>MC4R</i>   | rs6567160  |                        | 18 | 55980115  | C |
| <i>ELP3</i>   | rs13253111 |                        | 8  | 28117893  | A |
| <i>RAB27B</i> | rs8092503  |                        | 18 | 50630485  | G |
| <i>LMX1B</i>  | rs3829849  |                        | 9  | 128430621 | T |
| <i>ADAM23</i> | rs13387838 |                        | 2  | 206989692 | A |
| <i>GPR61</i>  | rs7550711  |                        | 1  | 109884409 | T |

**VAT/SAT ratio**

|                |           |  |   |           |   |
|----------------|-----------|--|---|-----------|---|
| <i>LY86</i>    | rs912056  |  | 6 | 6681196   | T |
| <i>LYPLAL1</i> | rs6689335 |  | 1 | 217695305 | C |
| <i>UBE2E2</i>  | rs7374732 |  | 3 | 23178458  | C |

**Liver fat**

|                |            |  |    |           |   |
|----------------|------------|--|----|-----------|---|
| <i>LYPLAL1</i> | rs12137855 |  | 1  | 217515001 | C |
| <i>GCKR</i>    | rs780094   |  | 2  | 27594741  | T |
| <i>PPP1R3B</i> | rs4240624  |  | 8  | 9221641   | A |
| <i>NCAN</i>    | rs2228603  |  | 19 | 19190924  | T |
| <i>PNPLA3</i>  | rs738409   |  | 22 | 42656060  | G |

**Pericardial fat**

|              |            |  |   |           |   |
|--------------|------------|--|---|-----------|---|
| <i>TRIB2</i> | rs10198628 |  | 2 | 12881948  | G |
| <i>ENSA</i>  | rs6587515  |  | 1 | 148875512 | G |
| <i>EBF1</i>  | rs1650505  |  | 5 | 157962312 | G |

**SAT SNP**

|            |           |  |    |          |   |
|------------|-----------|--|----|----------|---|
| <i>FTO</i> | rs7185735 |  | 16 | 52380152 | G |
|------------|-----------|--|----|----------|---|

**SAT SNP female**

|              |           |  |    |          |   |
|--------------|-----------|--|----|----------|---|
| <i>GSDMB</i> | rs2123685 |  | 17 | 35307415 | T |
|--------------|-----------|--|----|----------|---|

**VAT and VATadjBMI SNP**

|              |           |  |   |         |   |
|--------------|-----------|--|---|---------|---|
| <i>RREB1</i> | rs2842895 |  | 6 | 7051315 | C |
|--------------|-----------|--|---|---------|---|

**VAT and VATadjBMI SNP female**

|               |            |  |   |           |   |
|---------------|------------|--|---|-----------|---|
| <i>GRAMD3</i> | rs10060123 |  | 5 | 125711809 | C |
|---------------|------------|--|---|-----------|---|

<sup>a</sup> Linkage disequilibrium between proxies and original SNPs:  $R^2 > 0.96$ ,  $D' = 1$

<sup>b</sup> Linkage disequilibrium between proxy and original SNP:  $R^2 = 0.93$ ,  $D' = 0.97$

**Table S1b.** Matrix presentation of the number of overlapping SNPs and/or loci per risk score / phenotype

SNPs overlap

|                              | Child BMI (N=15) | Adult BMI (N=97) | Adult WHR (N=49) | VAT/SAT ratio (N=3) | Adult fatty liver (N=5) | Adult pericardial fat (N=3) | SAT SNP | SAT SNP female | VAT and VATadjBMI SNP | VAT and VATadjBMI SNP female |
|------------------------------|------------------|------------------|------------------|---------------------|-------------------------|-----------------------------|---------|----------------|-----------------------|------------------------------|
| Child BMI (N=15)             | 15               |                  |                  |                     |                         |                             |         |                |                       |                              |
| Adult BMI (N=97)             | 3                | 97               |                  |                     |                         |                             |         |                |                       |                              |
| Adult WHR (N=49)             | 0                | 0                | 49               |                     |                         |                             |         |                |                       |                              |
| VAT/SAT ratio (N=3)          | 0                | 0                | 0                | 3                   |                         |                             |         |                |                       |                              |
| Adult fatty liver (N=5)      | 0                | 0                | 0                | 0                   | 5                       |                             |         |                |                       |                              |
| Adult pericardial fat (N=3)  | 0                | 0                | 0                | 0                   | 0                       | 3                           |         |                |                       |                              |
| SAT SNP                      | 0                | 0                | 0                | 0                   | 0                       | 0                           | 1       |                |                       |                              |
| SAT SNP female               | 0                | 0                | 0                | 0                   | 0                       | 0                           | 0       | 1              |                       |                              |
| VAT and VATadjBMI SNP        | 0                | 0                | 0                | 0                   | 0                       | 0                           | 0       | 0              | 1                     |                              |
| VAT and VATadjBMI SNP female | 0                | 0                | 0                | 0                   | 0                       | 0                           | 0       | 0              | 0                     | 1                            |

Loci\* overlap

|                              | Child BMI (N=15) | Adult BMI (N=97) | Adult WHR (N=49) | VAT/SAT ratio (N=3) | Adult fatty liver (N=5) | Adult pericardial fat (N=3) | SAT SNP | SAT SNP female | VAT and VATadjBMI SNP | VAT and VATadjBMI SNP female |
|------------------------------|------------------|------------------|------------------|---------------------|-------------------------|-----------------------------|---------|----------------|-----------------------|------------------------------|
| Child BMI (N=15)             | 15               |                  |                  |                     |                         |                             |         |                |                       |                              |
| Adult BMI (N=97)             | 6                | 97               |                  |                     |                         |                             |         |                |                       |                              |
| Adult WHR (N=49)             | 0                | 5                | 49               |                     |                         |                             |         |                |                       |                              |
| VAT/SAT ratio (N=3)          | 0                | 0                | 2                | 3                   |                         |                             |         |                |                       |                              |
| Adult fatty liver (N=5)      | 0                | 0                | 0                | 1                   | 5                       |                             |         |                |                       |                              |
| Adult pericardial fat (N=3)  | 0                | 0                | 0                | 0                   | 0                       | 3                           |         |                |                       |                              |
| SAT SNP                      | 1                | 0                | 0                | 0                   | 0                       | 0                           | 1       |                |                       |                              |
| SAT SNP female               | 0                | 0                | 0                | 0                   | 0                       | 0                           | 0       | 1              |                       |                              |
| VAT and VATadjBMI SNP        | 0                | 0                | 1                | 1                   | 0                       | 0                           | 0       | 0              | 1                     |                              |
| VAT and VATadjBMI SNP female | 0                | 0                | 0                | 0                   | 0                       | 0                           | 0       | 0              | 0                     | 1                            |

\* A locus was defined as the region +/- 500,000 base pairs from the location of the SNP

**Table S1c.** Matrix presentation of the correlation between the genetic risk scores

|                             |                     | Child BMI (N=15) | Adult BMI (N=97) | Adult WHR (N=49) | VAT/SAT ratio (N=3) | Adult fatty liver (N=5) | Adult pericardial fat (N=3) |
|-----------------------------|---------------------|------------------|------------------|------------------|---------------------|-------------------------|-----------------------------|
| Child BMI (N=15)            | Pearson Correlation | <b>1</b>         |                  |                  |                     |                         |                             |
|                             | Sig. (2-tailed)     |                  |                  |                  |                     |                         |                             |
|                             | N                   | <b>1867</b>      |                  |                  |                     |                         |                             |
| Adult BMI (N=97)            | Pearson Correlation | ,196**           | <b>1</b>         |                  |                     |                         |                             |
|                             | Sig. (2-tailed)     | .000             |                  |                  |                     |                         |                             |
|                             | N                   | 1867             | <b>1995</b>      |                  |                     |                         |                             |
| Adult WHR (N=49)            | Pearson Correlation | .022             | -.016            | <b>1</b>         |                     |                         |                             |
|                             | Sig. (2-tailed)     | .341             | .470             |                  |                     |                         |                             |
|                             | N                   | 1867             | 1995             | <b>1995</b>      |                     |                         |                             |
| VAT/SAT ratio (N=3)         | Pearson Correlation | -.025            | .022             | ,127**           | <b>1</b>            |                         |                             |
|                             | Sig. (2-tailed)     | .283             | .317             | .000             |                     |                         |                             |
|                             | N                   | 1867             | 1995             | 1995             | <b>1995</b>         |                         |                             |
| Adult fatty liver (N=5)     | Pearson Correlation | -.014            | .013             | .013             | ,057*               | <b>1</b>                |                             |
|                             | Sig. (2-tailed)     | .537             | .563             | .548             | .011                |                         |                             |
|                             | N                   | 1867             | 1995             | 1995             | 1995                | <b>1995</b>             |                             |
| Adult pericardial fat (N=3) | Pearson Correlation | .023             | .017             | -.011            | -.025               | -.028                   | <b>1</b>                    |
|                             | Sig. (2-tailed)     | .318             | .444             | .627             | .269                | .210                    |                             |
|                             | N                   | 1867             | 1995             | 1995             | 1995                | 1995                    | <b>1995</b>                 |

\*\* . Correlation is significant at the 0.01 level (2-tailed).

\* . Correlation is significant at the 0.05 level (2-tailed).

**Table S2.** Power calculation

|                              |                | N=1 738                 |                                             | N=1 993                 |                                             |
|------------------------------|----------------|-------------------------|---------------------------------------------|-------------------------|---------------------------------------------|
|                              | Std. Deviation | Beta detectable per SD* | Beta detectable per additional risk allele* | Beta detectable per SD* | Beta detectable per additional risk allele* |
| Childhood BMI (N=15)         | 4.09           |                         | 0.021                                       |                         | 0.020                                       |
| Adult BMI (N=97)             | 6.17           |                         | 0.014                                       |                         | 0.013                                       |
| Adult WHR (N=49)             | 4.47           |                         | 0.020                                       |                         | 0.018                                       |
| VAT/SAT ratio (N=3)*         | 1.16           | 0.088                   | 0.076                                       | 0.082                   | 0.071                                       |
| Adult fatty liver N=5)       | 1.20           |                         | 0.073                                       |                         | 0.068                                       |
| Adult pericardial fat (N=3)* | 0.98           |                         | 0.090                                       |                         | 0.084                                       |

\*Unweighted risk scores since no information on the effect estimates was available

\* Based on a power of 80% with a significance level of 0.005

**Table S3.** Associations of unweighted genetic risk scores with MRI adiposity measures (N= 1 995)

| Risk score                     | SAT (N=1 746)             |                             | VAT (N=1 742)             |                             | VAT/SAT ratio (N=1 738)    |       | Liver fat percentage (N=1 950) |                             | Pericardial fat mass (N=1 803) |       | BMI @ 10 (N=1 993)        |                             |
|--------------------------------|---------------------------|-----------------------------|---------------------------|-----------------------------|----------------------------|-------|--------------------------------|-----------------------------|--------------------------------|-------|---------------------------|-----------------------------|
| (number of SNPs in risk score) | Beta (CI 95%)             | P                           | Beta (CI 95%)             | P                           | Beta (CI 95%)              | P     | Beta (CI 95%)                  | P                           | Beta (CI 95%)                  | P     | Beta (CI 95%)             | P                           |
| <b>Main risk scores</b>        |                           |                             |                           |                             |                            |       |                                |                             |                                |       |                           |                             |
| Child BMI (N=15)               | 0.047<br>(0.027; 0.066)   | <b>5.00*10<sup>-6</sup></b> | 0.046<br>(0.025; 0.067)   | <b>2.40*10<sup>-5</sup></b> | -0.014<br>(-0.033; 0.005)  | 0.154 | 0.018<br>(-0.003; 0.038)       | 0.086                       | 0.004<br>(-0.017; 0.025)       | 0.680 | 0.069<br>(0.048; 0.089)   | <b>7.00*10<sup>-6</sup></b> |
| Adult BMI (N=97)               | 0.016<br>(0.009; 0.023)   | <b>9.00*10<sup>-6</sup></b> | 0.013<br>(0.005; 0.020)   | <b>0.001</b>                | -0.009<br>(-0.016; -0.002) | 0.010 | 0.003<br>(-0.004; 0.010)       | 0.438                       | 0.007<br>(0.000; 0.015)        | 0.066 | 0.022<br>(0.015; 0.029)   | <b>4.07*10<sup>-9</sup></b> |
| Adult WHR (N=49)               | -0.008<br>(-0.018; 0.002) | 0.114                       | -0.001<br>(-0.011; 0.010) | 0.909                       | 0.011<br>(0.001; 0.020)    | 0.028 | -0.002<br>(-0.012; 0.008)      | 0.649                       | -0.011<br>(-0.021; 0.000)      | 0.046 | -0.008<br>(-0.018; 0.002) | 0.116                       |
| VAT/SAT ratio (N=3)            | -0.006<br>(-0.044; 0.032) | 0.768                       | -0.008<br>(-0.049; 0.033) | 0.694                       | 0.001<br>(-0.036; 0.037)   | 0.966 | -0.012<br>(-0.050; 0.026)      | 0.554                       | -0.013<br>(-0.053; 0.027)      | 0.513 | -0.008<br>(-0.047; 0.031) | 0.702                       |
| Adult fatty liver N=5)         | 0.002<br>(-0.035; 0.038)  | 0.922                       | 0.006<br>(-0.033; 0.045)  | 0.755                       | 0.003<br>(-0.031; 0.038)   | 0.845 | 0.105<br>(0.069; 0.141)        | <b>1.57*10<sup>-8</sup></b> | 0.021<br>(-0.018; 0.059)       | 0.292 | -0.016<br>(-0.054; 0.021) | 0.394                       |
| Adult pericardial fat (N=3)    | -0.024<br>(-0.068; 0.020) | 0.283                       | 0.022<br>(-0.025; 0.069)  | 0.358                       | 0.056<br>(0.015; 0.098)    | 0.008 | -0.007<br>(-0.050; 0.037)      | 0.761                       | 0.061<br>(0.015; 0.107)        | 0.009 | -0.028<br>(-0.072; 0.017) | 0.226                       |

Bold values represent significant outcomes after Bonferroni correction for 10 analyses ( $P < 0.005$ )



**Table S4.** Associations of the BMI genetic risk scores with MRI adiposity measures adjusted for BMI (N= 1 995)

| Risk score<br>(number of SNPs in risk score) | SATadjBMI<br>(N=1 746)    |                             | VATadjBMI<br>(N=1 742)     |       | VAT/SAT ratio<br>adjBMI (N=1 738) |       | Liver fat<br>percentage<br>adjBMI (N=1<br>950) |                              | Pericardial fat<br>mass adjBMI (N=1<br>803) |              |
|----------------------------------------------|---------------------------|-----------------------------|----------------------------|-------|-----------------------------------|-------|------------------------------------------------|------------------------------|---------------------------------------------|--------------|
|                                              | Beta (CI 95%)             | P                           | Beta (CI 95%)              | P     | Beta (CI 95%)                     | P     | Beta (CI 95%)                                  | P                            | Beta (CI 95%)                               | P            |
| <b>Main risk scores</b>                      |                           |                             |                            |       |                                   |       |                                                |                              |                                             |              |
| Child BMI (N=15)                             | -0.004<br>(-0.014; 0.006) | 0.434                       | 0.004<br>(-0.008; 0.015)   | 0.545 | 0.006<br>(-0.004; 0.017)          | 0.243 | 0.000<br>(-0.010; 0.011)                       | 0.924                        | -0.005<br>(-0.017; 0.006)                   | 0.363        |
| Adult BMI (N=97)                             | 0.004<br>(-0.002; 0.010)  | 0.209                       | 0.002<br>(-0.005; 0.010)   | 0.565 | -0.003<br>(-0.010; 0.004)         | 0.350 | -0.004<br>(-0.011; 0.002)                      | 0.216                        | 0.002<br>(-0.006; 0.009)                    | 0.681        |
| Adult WHR (N=49)                             | 0.0004<br>(-0.008; 0.009) | 0.929                       | 0.007<br>(-0.003; 0.017)   | 0.181 | 0.006<br>(-0.004; 0.015)          | 0.243 | 0.002<br>(-0.007; 0.011)                       | 0.608                        | -0.007<br>(-0.017; 0.003)                   | 0.188        |
| VAT/SAT ratio (N=3)*                         | 0.002<br>(-0.032; 0.037)  | 0.888                       | -0.001<br>(-0.041; 0.038)  | 0.945 | -0.002<br>(-0.039; 0.035)         | 0.929 | -0.010<br>(-0.046; 0.025)                      | 0.573                        | -0.012<br>(-0.052; 0.028)                   | 0.565        |
| Adult fatty liver (N=5)                      | 0.019<br>(-0.013; 0.051)  | 0.247                       | 0.011<br>(-0.026; 0.049)   | 0.549 | -0.01<br>(-0.045; 0.025)          | 0.569 | 0.128<br>(0.095; 0.161)                        | <b>4.73*10<sup>-14</sup></b> | 0.021<br>(-0.017; 0.059)                    | 0.278        |
| Adult pericardial fat (N=3)*                 | -0.013<br>(-0.052; 0.027) | 0.521                       | 0.038<br>(-0.007; 0.084)   | 0.101 | 0.058<br>(0.016; 0.100)           | 0.007 | -0.001<br>(-0.042; 0.039)                      | 0.945                        | 0.074<br>(0.028; 0.120)                     | <b>0.002</b> |
| rs7185735 (SAT)                              | 0.12<br>(0.063; 0.177)    | <b>3.70*10<sup>-5</sup></b> | 0.036<br>(-0.030; 0.103)   | 0.282 | -0.086<br>(-0.148; -0.025)        | 0.006 | 0.003<br>(0.056; 0.063)                        | 0.918                        | 0.0002<br>(-0.067; 0.068)                   | 0.997        |
| rs2123685 (SAT female)                       | -0.085<br>(-0.243; 0.074) | 0.294                       | -0.225<br>(-0.408; -0.041) | 0.016 | -0.178<br>(-0.348290; -0.007)     | 0.041 | 0.064<br>(-0.100; 0.228)                       | 0.445                        | -0.087<br>(-0.270; 0.097)                   | 0.354        |
| rs2842895 (VAT and VATadjBMI)                | 0.018<br>(-0.041; 0.076)  | 0.549                       | -0.004<br>(-0.072; 0.064)  | 0.905 | -0.032<br>(-0.094; 0.031)         | 0.326 | -0.007<br>(-0.068; 0.053)                      | 0.815                        | 0.048<br>(-0.021; 0.116)                    | 0.173        |
| rs10060123 (VAT and VATadjBMI female)        | -0.024<br>(-0.089; 0.041) | 0.464                       | -0.051<br>(-0.126; 0.024)  | 0.180 | -0.034<br>(-0.103; 0.036)         | 0.342 | -0.010<br>(-0.076; 0.057)                      | 0.777                        | -0.050<br>(-0.125; 0.026)                   | 0.197        |

\*Unweighted risk scores since no information on the effect estimates was available

Bold values represent significant outcomes after Bonferroni correction for 10 analyses ( $P < 0.005$ )

**Table S5.** Associations of the BMI genetic risk scores with SAT and VAT measures adjusted for VAT and SAT (N= 1 995)

| Risk score<br>(number of SNPs in risk score) | SATadjVAT(N=1 736) **      |                             | VATadjSAT (N=1 736) **     |       |
|----------------------------------------------|----------------------------|-----------------------------|----------------------------|-------|
|                                              | Beta (CI 95%)              | P                           | Beta (CI 95%)              | P     |
| <b>Main risk scores</b>                      |                            |                             |                            |       |
| Child BMI (N=15)                             | 0.008<br>(-0.003; 0.018)   | 0.152                       | 0.008<br>(-0.004; 0.019)   | 0.179 |
| Adult BMI (N=97)                             | 0.014<br>(0.008; 0.021)    | <b>2.90*10<sup>-5</sup></b> | 0.0002<br>(-0.007; 0.007)  | 0.962 |
| Adult WHR (N=49)                             | -0.011<br>(-0.021; -0.002) | 0.018                       | 0.007<br>(-0.003; 0.017)   | 0.168 |
| VAT/SAT ratio (N=3)*                         | -0.002<br>(-0.039; 0.034)  | 0.899                       | -0.004<br>(-0.043; 0.035)  | 0.841 |
| Adult fatty liver (N=5)                      | 0.007<br>(-0.028; 0.041)   | 0.708                       | -0.002<br>(-0.039; 0.035)  | 0.912 |
| Adult pericardial fat (N=3)*                 | -0.057<br>(-0.099; -0.015) | 0.008                       | 0.057<br>(0.011; 0.102)    | 0.014 |
| rs7185735 (SAT)                              | 0.132<br>(0.071; 0.193)    | <b>2.20*10<sup>-5</sup></b> | -0.042<br>(-0.107; 0.024)  | 0.212 |
| rs2123685 (SAT female)                       | 0.128<br>(-0.040; 0.297)   | 0.136                       | -0.208<br>(-0.389; -0.027) | 0.024 |
| rs2842895 (VAT and VATadjBMI)                | 0.024<br>(-0.038; 0.087)   | 0.444                       | -0.019<br>(-0.086; 0.048)  | 0.580 |
| rs10060123 (VAT and VATadjBMI female)        | 0.006<br>(-0.063; 0.075)   | 0.855                       | -0.049<br>(-0.123; 0.025)  | 0.194 |

\*Unweighted risk scores since no information on the effect estimates was available

Bold values represent significant outcomes after Bonferroni correction for 10 analyses ( $P < 0.005$ )

\*\* **SATadjVAT**: SAT adjusted for VAT

**VATadjSAT**: VAT adjusted for SAT

**Table S6.** Phenotypic variance in MRI fat measures explained by genetic risk scores based on adult and childhood BMI, and liver fat, and separate SNPs in the full group (N= 1 995)

| <b>Risk score</b>                     | <b>SAT<br/>(N=1 746)</b>          | <b>VAT<br/>(N=1 742)</b>          | <b>VAT/SAT<br/>ratio<br/>(N=1 738)</b> | <b>Liver fat<br/>percentage<br/>(N=1 950)</b> | <b>Pericardial<br/>fat mass<br/>(N=1 803)</b> | <b>BMI @ 10<br/>(N=1 993)</b>     |
|---------------------------------------|-----------------------------------|-----------------------------------|----------------------------------------|-----------------------------------------------|-----------------------------------------------|-----------------------------------|
| <b>(SNPs in risk score)</b>           | <b>Explained<br/>variance (%)</b> | <b>Explained<br/>variance (%)</b> | <b>Explained<br/>variance (%)</b>      | <b>Explained<br/>variance (%)</b>             | <b>Explained<br/>variance (%)</b>             | <b>Explained<br/>variance (%)</b> |
| Childhood BMI (N=15)                  | <b>1.167</b>                      | <b>0.636</b>                      | 0.874                                  | 0.464                                         | <0.001                                        | <b>1.765</b>                      |
| Adult BMI (N=97)                      | <b>1.769</b>                      | <b>1.107</b>                      | <b>0.566</b>                           | 0.068                                         | 0.331                                         | <b>2.458</b>                      |
| Adult WHR (N=49)                      | 0.177                             | 0.007                             | 0.238                                  | 0.006                                         | 0.197                                         | 0.181                             |
| VAT/SAT ratio (N=3)*                  | 0.002                             | 0.002                             | <0.001                                 | 0.019                                         | 0.016                                         | 0.103                             |
| Adult fatty liver N=5)                | 0.056                             | 0.047                             | 0.006                                  | <b>2.222</b>                                  | 0.364                                         | 0.046                             |
| Adult pericardial fat (N=3)*          | 0.004                             | 0.009                             | 0.303                                  | 0.005                                         | 0.023                                         | 0.195                             |
| rs7185735 (SAT)                       | <b>1.042</b>                      | 0.400                             | <b>0.714</b>                           | 0.092                                         | 0.066                                         | <b>0.669</b>                      |
| rs2123685 (SAT female)                | 0.007                             | 0.168                             | 0.093                                  | 0.035                                         | 0.022                                         | 0.130                             |
| rs2842895 (VAT and VATadjBM)          | 0.019                             | 0.000                             | 0.019                                  | <0.001                                        | 0.126                                         | 0.153                             |
| rs10060123 (VAT and VATadjBMI female) | 0.085                             | 0.168                             | 0.004                                  | 0.030                                         | 0.166                                         | 0.144                             |

Bold values represent explained variances for significant associations of the risk scores / SNPs with the outcome

\*Unweighted risk scores since no information on the effect estimates was available.

**Table S7.** Phenotypic variance in MRI fat measures explained by genetic risk scores based on adult and childhood BMI, and liver fat, and separate SNPs in boys (N=979) and girls (N=1 016) separately

| <b>Risk score</b>                     | <b>SAT<br/>(N=1 746)</b>          | <b>VAT<br/>(N=1 742)</b>          | <b>VAT/SAT<br/>ratio<br/>(N=1 738)</b> | <b>Liver fat<br/>percentage<br/>(N=1 950)</b> | <b>Pericardial fat<br/>mass<br/>(N=1 803)</b> | <b>BMI @ 10<br/>(N=1 993)</b>     |
|---------------------------------------|-----------------------------------|-----------------------------------|----------------------------------------|-----------------------------------------------|-----------------------------------------------|-----------------------------------|
| <b>(SNPs in risk score)</b>           | <b>Explained<br/>variance (%)</b> | <b>Explained<br/>variance (%)</b> | <b>Explained<br/>variance (%)</b>      | <b>Explained<br/>variance (%)</b>             | <b>Explained<br/>variance (%)</b>             | <b>Explained<br/>variance (%)</b> |
| <b>Boys</b>                           |                                   |                                   |                                        |                                               |                                               |                                   |
| Childhood BMI (N=15)                  | <b>0.936</b>                      | 0.404                             | 0.804                                  | 0.352                                         | <0.001                                        | <b>2.261</b>                      |
| Adult BMI (N=97)                      | <b>2.509</b>                      | <b>1.202</b>                      | <b>0.972</b>                           | 0.195                                         | 0.384                                         | <b>2.931</b>                      |
| Adult WHR (N=49)                      | 0.166                             | 0.032                             | 0.073                                  | 0.016                                         | 0.259                                         | 0.338                             |
| VAT/SAT ratio (N=3)*                  | 0.103                             | 0.041                             | 0.040                                  | 0.028                                         | 0.005                                         | 0.087                             |
| Adult fatty liver N=5)                | 0.175                             | 0.081                             | 0.190                                  | <b>1.440</b>                                  | <0.001                                        | 0.029                             |
| Adult pericardial fat (N=3)*          | 0.002                             | 0.196                             | 0.228                                  | 0.001                                         | 0.077                                         | 0.083                             |
| rs7185735 (SAT)                       | 0.521                             | 0.239                             | 0.228                                  | 0.104                                         | 0.241                                         | 0.230                             |
| rs2123685 (SAT female)                | 0.010                             | 0.238                             | 0.145                                  | 0.014                                         | 0.194                                         | 0.149                             |
| rs2842895 (VAT and VATadjBM)          | 0.000                             | 0.055                             | 0.048                                  | 0.063                                         | 0.028                                         | 0.032                             |
| rs10060123 (VAT and VATadjBMI female) | 0.184                             | 0.172                             | 0.022                                  | 0.492                                         | 0.107                                         | 0.188                             |
| <b>Girls</b>                          |                                   |                                   |                                        |                                               |                                               |                                   |
| Childhood BMI (N=15)                  | 1.550                             | 0.828                             | 1.406                                  | 0.468                                         | <0.001                                        | <b>1.682</b>                      |
| Adult BMI (N=97)                      | <b>1.369</b>                      | <b>1.007</b>                      | 0.376                                  | 0.002                                         | 0.276                                         | <b>1.813</b>                      |
| Adult WHR (N=49)                      | 0.215                             | <0.001                            | 0.553                                  | 0.001                                         | 0.139                                         | <0.001                            |
| VAT/SAT ratio (N=3)*                  | 0.204                             | 0.151                             | 0.041                                  | 0.019                                         | 0.128                                         | <0.001                            |
| Adult fatty liver N=5)                | 0.172                             | 0.068                             | 0.091                                  | <b>3.096</b>                                  | 0.039                                         | 0.012                             |
| Adult pericardial fat (N=3)*          | 0.218                             | 0.002                             | 0.395                                  | 0.004                                         | <b>0.993</b>                                  | <0.001                            |
| rs7185735 (SAT)                       | <b>2.086</b>                      | 0.615                             | <b>1.746</b>                           | 0.081                                         | 0.002                                         | <b>0.944</b>                      |
| rs2123685 (SAT female)                | 0.007                             | 0.118                             | 0.066                                  | 0.227                                         | 0.026                                         | <0.001                            |
| rs2842895 (VAT and VATadjBM)          | 0.059                             | 0.044                             | 0.001                                  | 0.022                                         | 0.301                                         | <0.001                            |
| rs10060123 (VAT and VATadjBMI female) | 0.029                             | 0.167                             | 0.085                                  | 0.087                                         | 0.230                                         | <0.001                            |

Bold values represent explained variances for significant associations of the risk scores / SNPs with the outcome

\*Unweighted risk scores since no information on the effect estimates was available.
